# Supplementary material for: Effect of Low FODMAPs Diet on Irritable Bowel Syndromes: A Systematic Review and Meta-Analysis of Clinical Trials
Source: MDPI journal article supplement (doi:10.3390/nu13072460), 2021-07-19
Supplement: s1 [file s1]

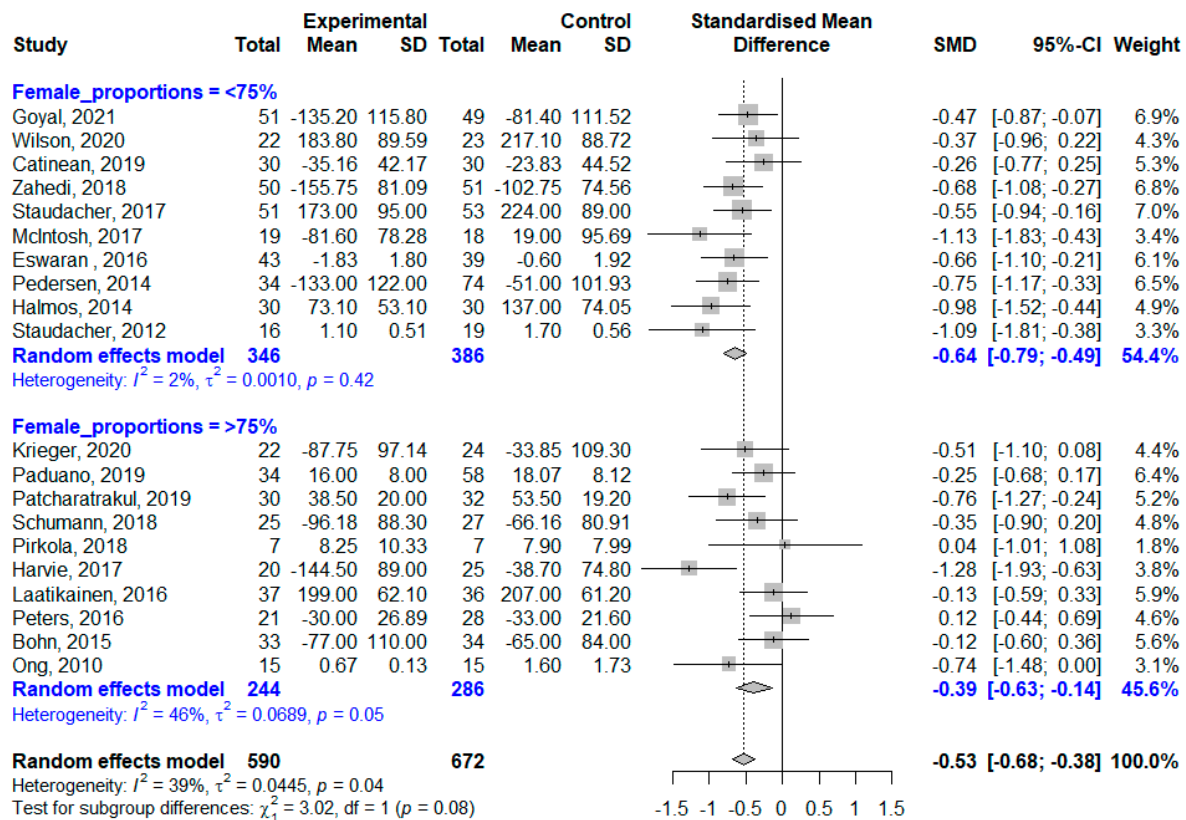

Figure S1. Forest plot for subgroup analysis on female proportion

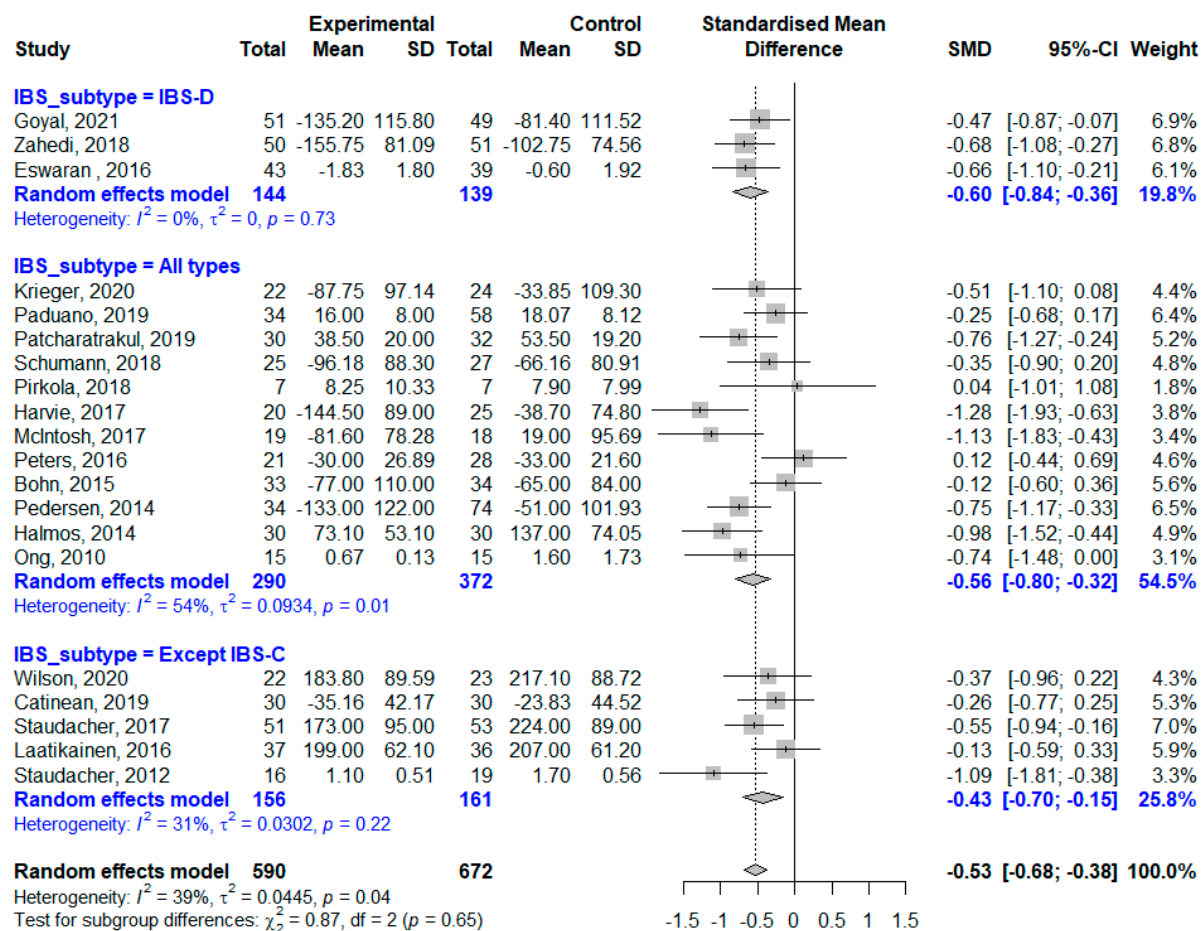

Figure S2. Forest plot for subgroup analysis on IBS subtype

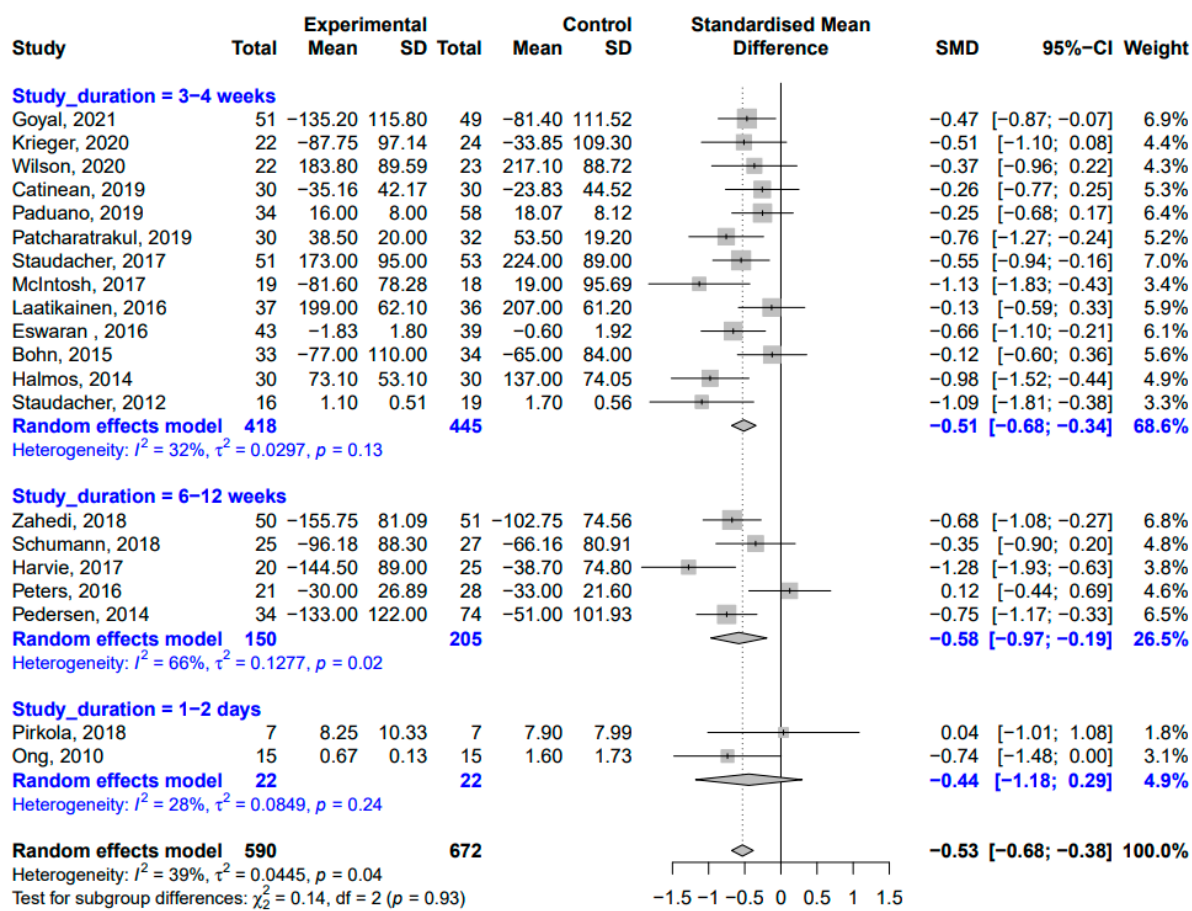

Figure S3. Forest plot for subgroup analysis on study duration

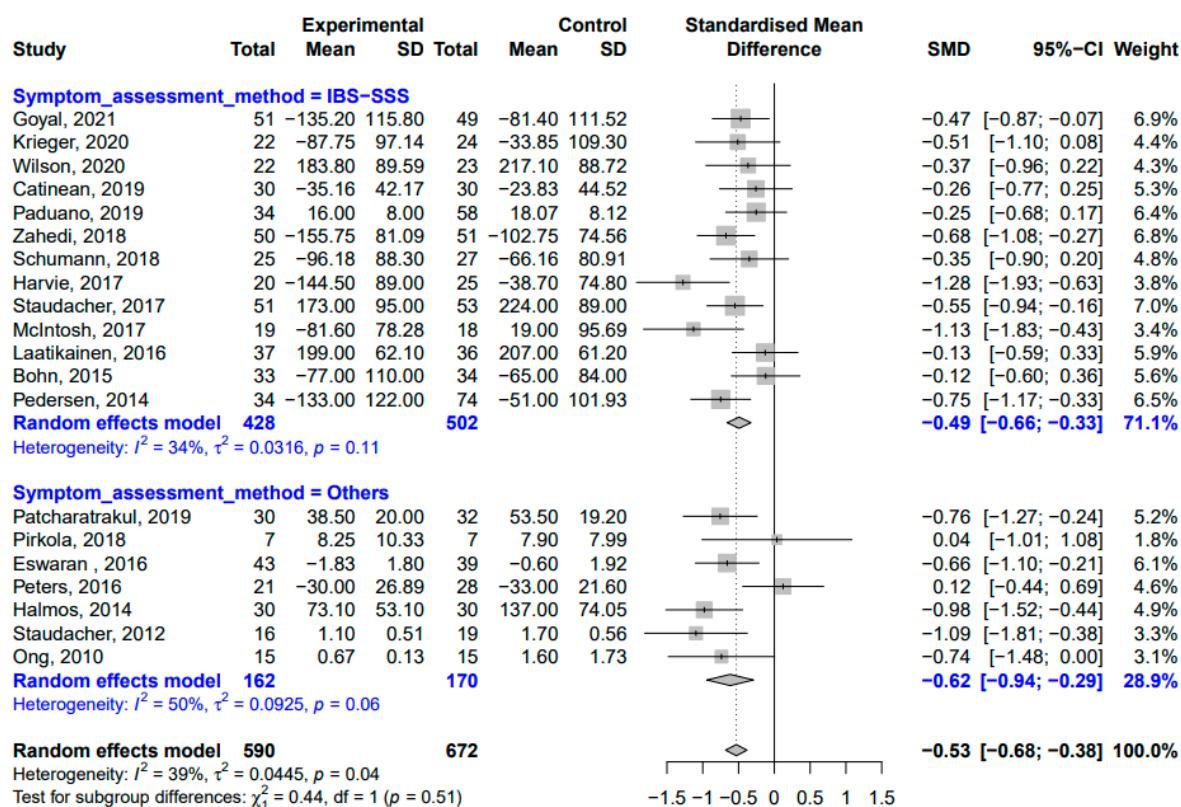

Figure S4. Forest plot for subgroup analysis on symptom assessment method

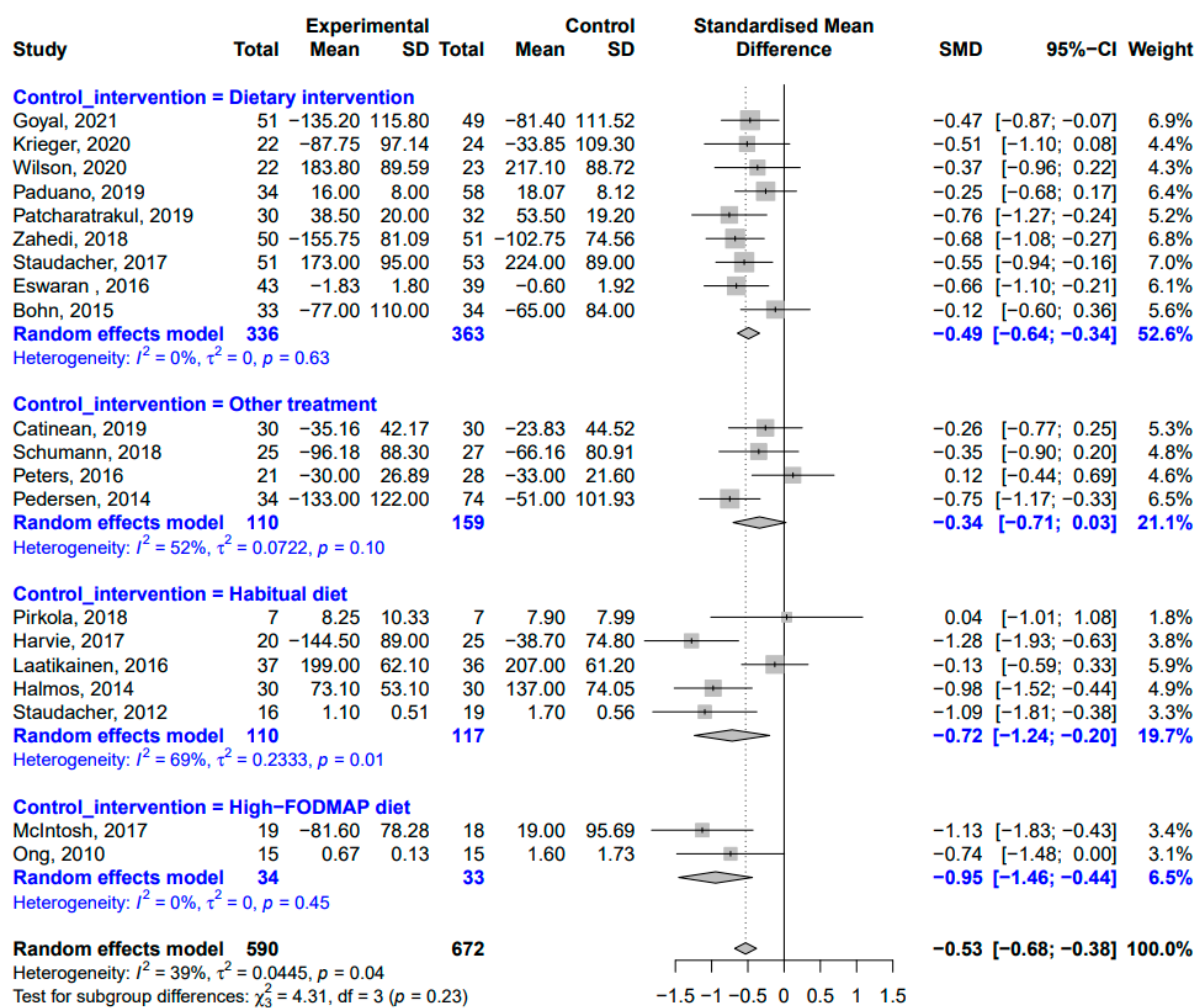

Figure S5. Forest plot for subgroup analysis on control group type

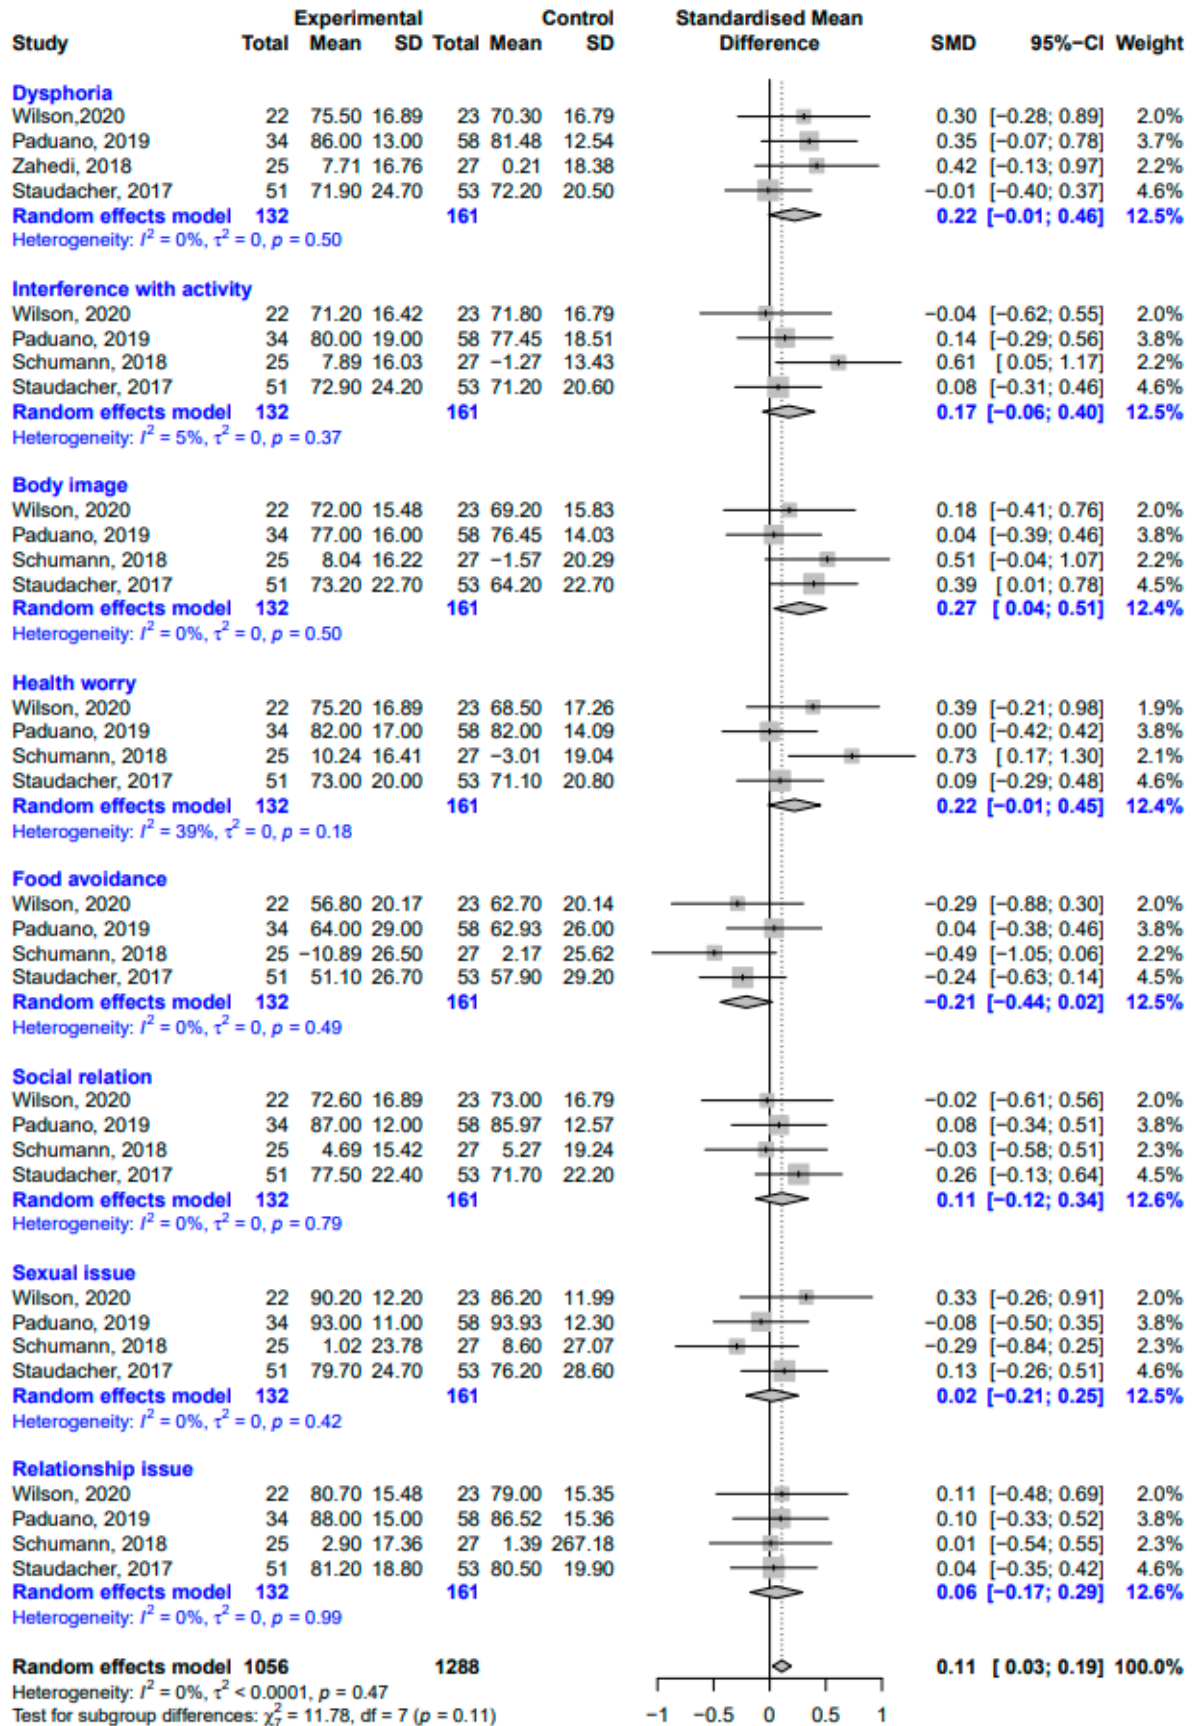

Figure S6. Forest plot showing standardized mean differences for IBS-QoL subscale score



Table S1. Sensitivity analysis for the outcome of IBS symptoms severity

| Omitting             | SMD [95% CI]           |
|----------------------|------------------------|
| Goyal, 2021          | 0.528 [-0.647; -0.409] |
| Krieger, 2020        | 0.524 [-0.640; -0.407] |
| Wilson, 2020         | 0.529 [-0.646; -0.413] |
| Catinean, 2019       | 0.537 [-0.655; -0.420] |
| Paduano, 2019        | 0.544 [-0.663; -0.426] |
| Patcharatrakul, 2019 | 0.511 [-0.628; -0.394] |
| Zahedi, 2018         | 0.51 [-0.629; -0.391]  |
| Schumann, 2018       | 0.531 [-0.648; -0.414] |
| Pirkola, 2018        | 0.53 [-0.645; -0.415]  |
| Harvie, 2017         | 0.499 [-0.615; -0.383] |
| Staudacher, 2017     | 0.521 [-0.640; -0.401] |
| McIntosh, 2017       | 0.507 [-0.622; -0.391] |
| Laatikainen, 2016    | 0.549 [-0.667; -0.431] |
| Eswaran, 2016        | 0.514 [-0.632; -0.396] |
| Peters, 2016         | 0.551 [-0.667; -0.434] |
| Bohn, 2015           | 0.547 [-0.665; -0.430] |
| Pedersen, 2014       | 0.505 [-0.624; -0.386] |
| Halmos, 2014         | 0.502 [-0.619; -0.385] |
| Staudacher, 2012     | 0.509 [-0.624; -0.393] |
| Ong, 2010            | 0.518 [-0.634; -0.403] |
| Goyal, 2021          | 0.528 [-0.647; -0.409] |

Table S2. Sensitivity analysis for the outcome of IBS-related quality of life

| Omitting          | SMD (95% CI)         |
|-------------------|----------------------|
| Goyal, 2021       | 0.223 [0.076; 0.371] |
| Wilson, 2020      | 0.185 [0.076; 0.371] |
| Paduano, 2019     | 0.211 [0.065; 0.358] |
| Zahedi, 2018      | 0.275 [0.127; 0.423] |
| Schumann, 2018    | 0.203 [0.060; 0.346] |
| Eswaran, 2017     | 0.164 [0.019; 0.310] |
| Harvie, 2017      | 0.169 [0.027; 0.311] |
| Staudacher, 2017  | 0.231 [0.083; 0.380] |
| Laatikainen, 2016 | 0.241 [0.096; 0.386] |
| Peters, 2016      | 0.244 [0.102; 0.385] |
| Pedersen, 2014    | 0.207 [0.060; 0.354] |
